# Supplementary material for: Neutralizing IFN-γ autoantibodies are rare and pathogenic in HLA-DRB1*15:02 or 16:02 individuals
Source: JCI journal article supplement (doi:10.1172/jci178263), 2024-03-12
Supplement: sd1 [file 1]

Supplemental Table 1

| Patient | Sex | Follow | Age at onset of symptoms | Clinical phenotype (infections, microbiology, other diseases)                                                                                        | Neutralizing auto-Abs to cytokines | Other auto-Abs                                                                                      | Reference                                                                                                             |
|---------|-----|--------|--------------------------|------------------------------------------------------------------------------------------------------------------------------------------------------|------------------------------------|-----------------------------------------------------------------------------------------------------|-----------------------------------------------------------------------------------------------------------------------|
| P1      | F   | Dead   | 52 years                 | Disseminated infection by <i>M. fortuitum</i><br>Recurrent disseminated infection by <i>M. avium</i><br><br>Autoimmune thyroiditis                   |                                    | SLE ANA(+)<br>Anti-SSA(+)<br>ASMA (-)<br>AMA (-)<br>Anti-LKM1/anti-E2PDH/anti LC1/anti-SLA (-)      | Ku CL et al. J Allergy Clin Immunol 2016, 137(3):954-8.                                                               |
| P2      | F   | Alive  | 50 years                 | Disseminated infection by <i>M. fortuitum</i><br>Osteomyelitis by <i>M. intracellulare</i><br>Recurrent thoracic varicella zoster                    | Anti-GM-CSF (+)                    | SLE ANA(-)<br>Anti-SSA(-)<br>ASMA (-)<br>AMA (-)<br>Anti-LKM1/anti-E2PDH/anti LC1/anti-SLA (-)      | Valour F et al, Emerg Infect Dis 2016, 22(6):1124-1126<br><br>Ku CL et al. J Allergy Clin Immunol 2016, 137(3):954-8. |
| P3      | F   | Alive  | 44 years                 | Adenitis by <i>M. fortuitum</i><br>Adenitis by <i>P. marfaneii</i><br>Adenitis by <i>M. scrofulaceum</i><br><br>Autoimmune thyroiditis, sclerodermia |                                    | SLE ANA(+)<br>Anti-SSA(-)<br>ASMA (-)<br>AMA (-)<br>Anti-LKM1/anti-E2PDH/anti LC1/anti-SLA (-)      | Ku CL et al. J Allergy Clin Immunol 2016, 137(3):954-8.                                                               |
| P4      | M   | Alive  | 29 years                 | Disseminated infection by <i>M. fortuitum</i>                                                                                                        |                                    | SLE ANA(+)<br>Anti-SSA(-)<br>ASMA (+)<br>AMA (-)<br>Anti-LKM1/anti-E2PDH/anti LC1/anti-SLA (-)      | This paper                                                                                                            |
| P5      | M   | Alive  | 52 years                 | Osteomyelitis by <i>Histoplasma capsulatum</i><br>Disseminated infection by <i>M. avium</i><br><i>Herpes Simplex</i> ophthalmicus                    |                                    | SLE ANA(-)<br>Anti-SSA(-)<br>ASMA (-)<br>AMA (-)<br>Anti-LKM1/anti-E2PDH/anti LC1/anti-SLA (-)      | This paper                                                                                                            |
| P6      | M   | Alive  | 36 years                 | Spondylodiscitis L5-S1, paravertebral abscess by <i>M. avium</i>                                                                                     |                                    | SLE ANA(ND)<br>Anti-SSA(ND)<br>ASMA (ND)<br>AMA (ND)<br>Anti-LKM1/anti-E2PDH/anti LC1/anti-SLA (ND) | This paper                                                                                                            |
| P7      | M   | Alive  | 53 years                 | Severe infection by <i>Legionella pneumonia</i><br>Recurrent disseminated infection by <i>M. avium</i>                                               |                                    |                                                                                                     | This paper                                                                                                            |

Abbreviations: ANA: antinuclear antibody, ASMA: anti-smooth muscle antibody; AMA: anti-mitochondria; ND not determined

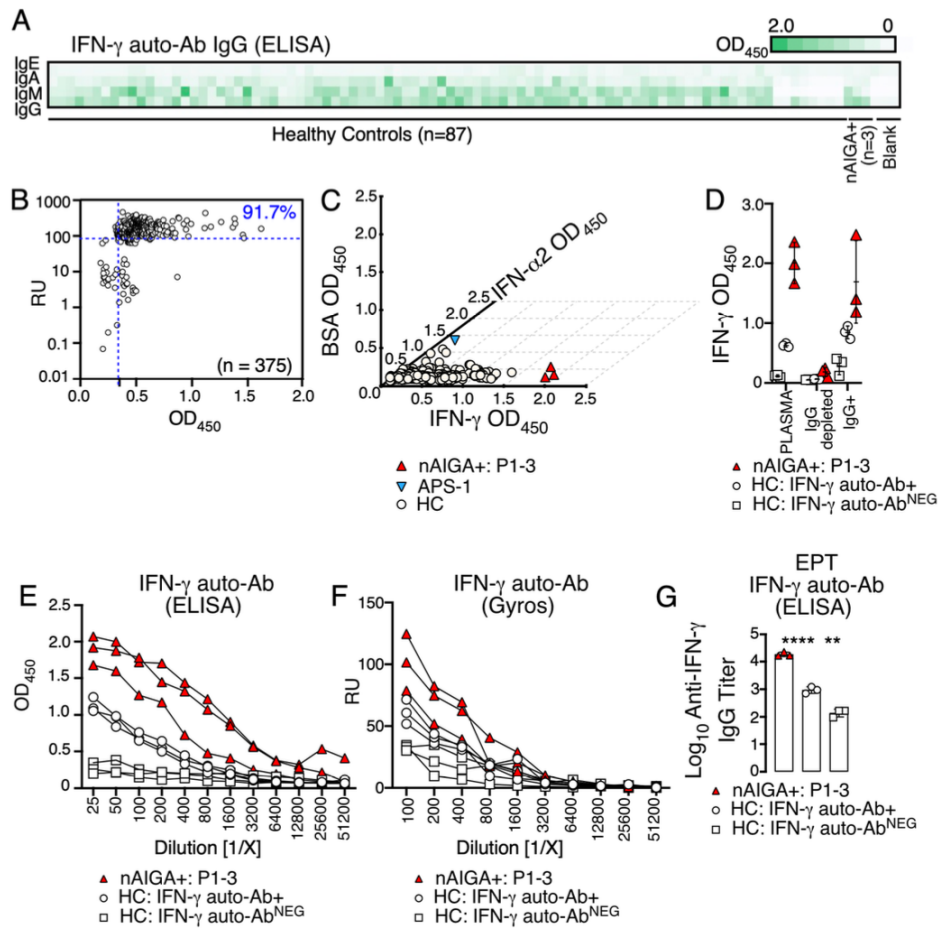

**Supplemental Figure 1. related to Figure 1 IFN- $\gamma$  auto-Abs are detected in the general population though not neutralizing.**

**(A)** A heatmap displays IFN- $\gamma$  auto-Abs (IgM, IgA, IgG) detectable in 87 healthy controls of the general population, ranging from lowest to highest optical densities ( $OD_{450}$ ).

**(B)** Correlation analysis between IFN- $\gamma$  auto-Abs detection by Gyros and ELISA, with a subset of individuals enriched for Gyros-positive results. The positivity threshold is indicated by a blue dotted line.

**(C)** Correlation between IFN- $\gamma$  auto-Abs detection and other antigens (IFN- $\alpha$ 2 and BSA) among individuals of the general population, nAIGA patients, and APS-1 patients.

**(D)** IgG purification and IFN- $\gamma$  auto-Abs detection by ELISA in whole plasma, IgG-depleted fraction, and IgG-purified fraction of patients with EM infections, healthy controls with and without detectable IFN- $\gamma$  auto-Abs, and nAIGA patients.

**(E)** Titers of plasma from IFN- $\gamma$  auto-Abs-positive healthy controls, IFN- $\gamma$  auto-Abs-negative healthy controls, and patients with EM infections due to nAIGA, as determined by ELISA.

**(F)** Titers of plasma from IFN- $\gamma$  auto-Abs-positive healthy controls, IFN- $\gamma$  auto-Abs-negative healthy controls, and patients with EM infections due to nAIGA, as determined by Gyros.

**(G)** Endpoint titer determined by the  $Log_{10}$ (lowest detectable dilution) from IFN- $\gamma$  auto-Abs-positive healthy controls, IFN- $\gamma$  auto-Abs-negative healthy controls, and patients with EM infections due to nAIGA.

Data represent two experiments (A, C-G), with each sample tested once for large-scale screening (B). Statistical significance was calculated using an unpaired student's T test, with significance denoted as \* $p < 0.05$ , \*\* $p \leq 0.01$ , \*\*\* $p \leq 0.001$ , \*\*\*\* $p \leq 0.0001$ , or unmarked for nonsignificance.

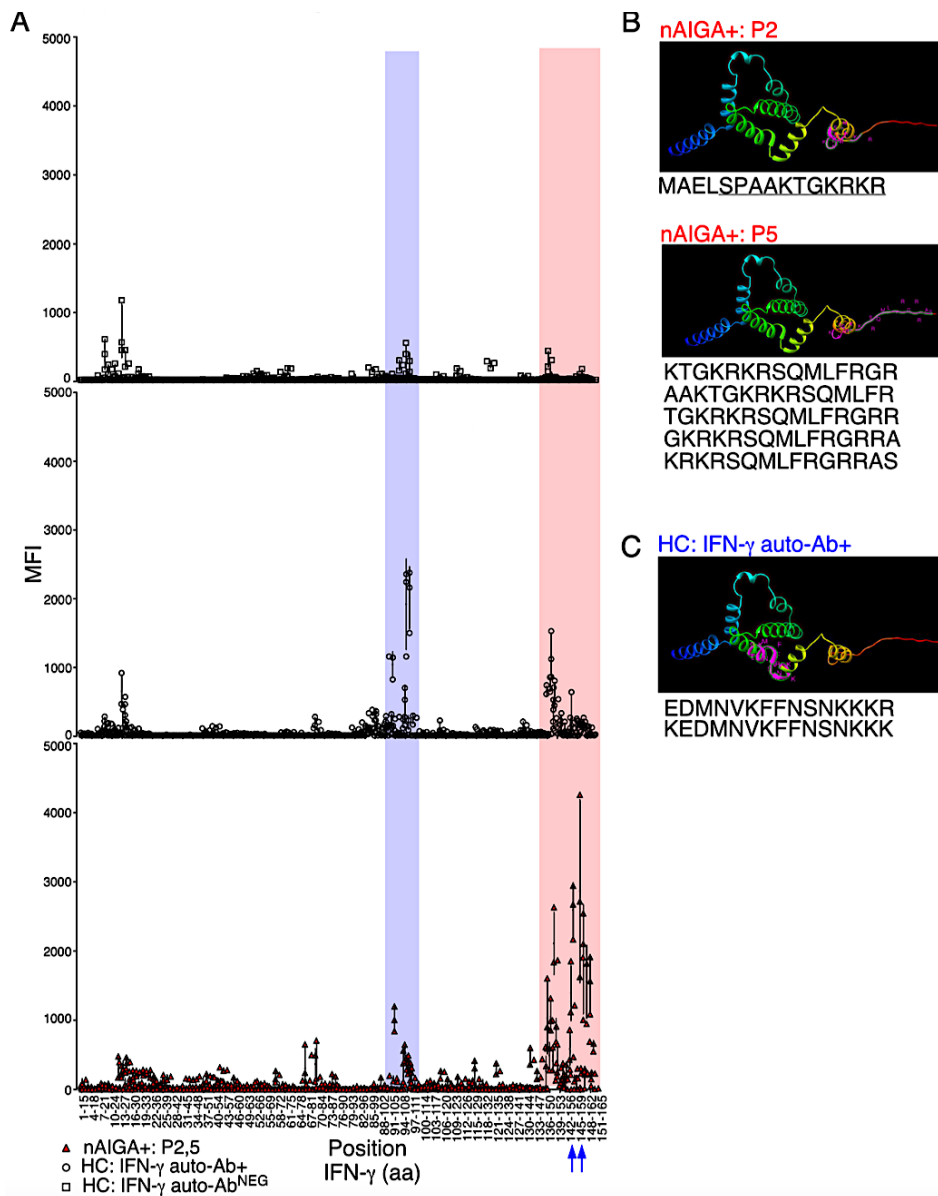

**Supplemental Figure 2 related to Figure 2**

**IFN-γ auto-Abs of the general population are of low affinity and are functionally distinct.**

(A) 2 individuals of the general population that were negative for detection against full length IFN-γ auto-Abs (white squares, top), 2 individuals of the general population that were positive for detection against full length IFN-γ auto-Abs (white circles, middle), and 2 nAIGA patients (red triangles, bottom) were assayed by a custom peptide microarray from PepperPrint in duplicate. Mean fluorescent intensities (MFI) were plotted with respect to amino acid position of IFN-γ. Regions of significant epitopes are highlighted in blue and red.

(B) Predicted structure of IFN-γ from AlphaFold protein structure database, epitopes as determined by (A, red) in magenta from patients harboring nAIGA.

(C) Predicted structure of IFN-γ from AlphaFold protein structure database, epitopes as determined by (A, blue) in magenta from a healthy control (HC) harboring IFN-γ auto-Abs.

Each sample was tested once. Triplicate is a technical replicate.

918  
919  
920

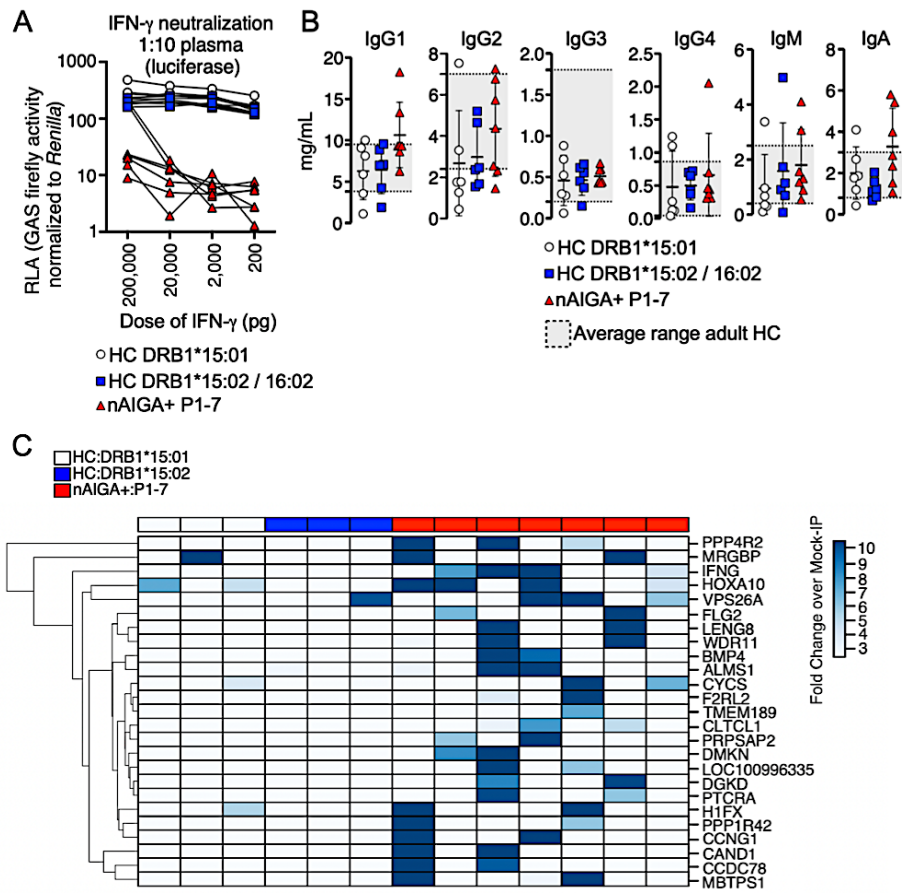

921  
922  
923  
924  
925  
926  
927  
928  
929  
930  
931  
932  
933  
934  
935  
936

#### Supplemental Figure 3 related to Figure 4

**nAIGA are rare and are not detected in those with autoimmune conditions.**

(A) Results for the neutralization of IFN- $\gamma$  (200 pg/ml-20 ng, final concentration) in the presence of plasma 1:10 from (7) patients with EM infections due to nAIGA (red triangles), (3) HLA-DRB1\*15:02 and/or 16:02 carriers (blue squares), and (3) HLA-DRB1\*15:01 carriers (white circles). Relative luciferase activity is shown (GAS dual luciferase activity, with normalization against *Renilla* luciferase activity) after stimulation with IFN- $\gamma$  (200 pg/ml-20 ng) in the presence of plasma 1:10. RLA, relative luciferase activity.

(B) Total Ig assessed in the serum from (7) patients with EM infections due to nAIGA (red triangles), (3) HLA-DRB1\*15:02 and/or 16:02 carriers (blue squares), and (3) HLA-DRB1\*15:01 carriers (white circles) by Legendplex.

(C) Heatmap of top specific auto-Abs in the serum from (7) patients with EM infections due to nAIGA (red triangles), (3) HLA-DRB1\*15:02 and/or 16:02 carriers (blue squares), and (3) HLA-DRB1\*15:01 carriers (white circles) as assessed by PhIP-seq.

Data are representative of 2 experiments (A, B). For PhIP-seq (C) each sample was tested once.
